# Supplementary material
Source: ML conference proceedings conference paper supplement (https://openreview.net/forum?id=vBn2OXZuQCF)
Supplement: supplementary_material [file attachment]

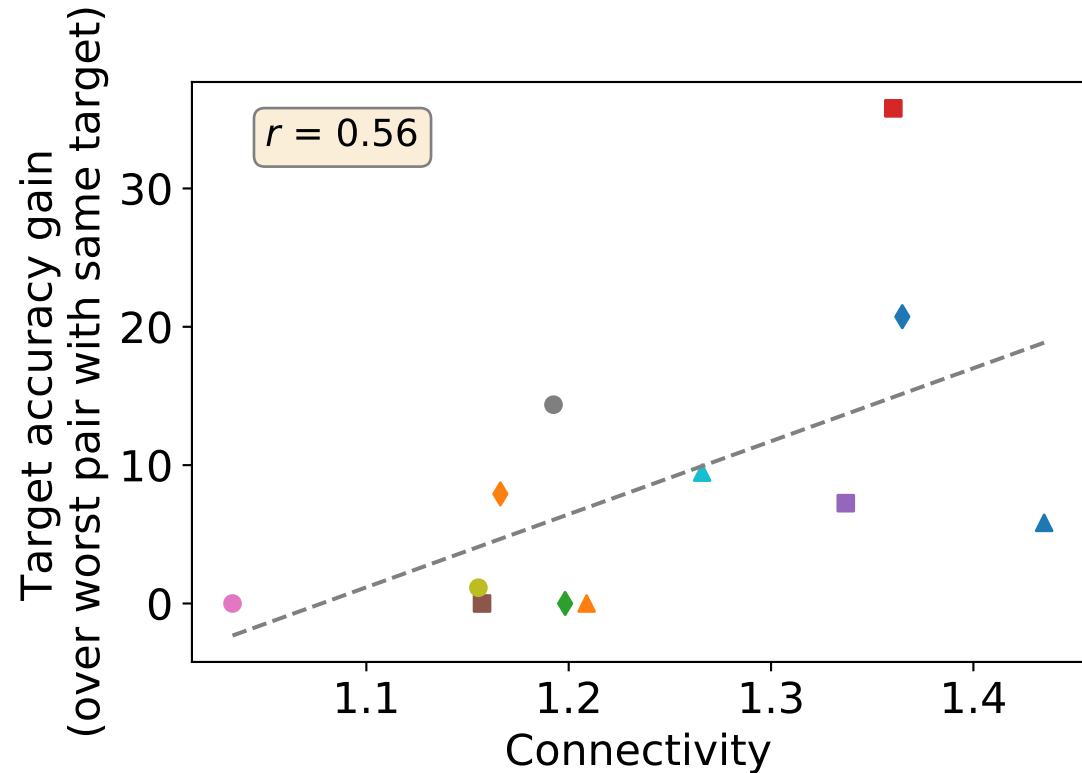

- real-clipart
- sketch-clipart
- painting-clipart
- real-painting
- sketch-painting
- clipart-painting
- sketch-real
- painting-real
- clipart-real
- real-sketch
- painting-sketch
- clipart-sketch
